# Supplementary material for: Effects of chlorinated Pd precursors and preparation methods on properties and activity of Pd/TiO2catalysts
Source: Royal Society of Chemistry journal article supplement (doi:10.1039/d0ra07510h), 2020-01-01
Supplement: d0ra07510h1.pdf [file d0ra07510h1.pdf]

## **Supplementary Information**

### **Effect of chlorinated Pd precursors and preparation methods on properties and activity of Pd/TiO<sub>2</sub> catalysts**

Ye Eun Kim <sup>a,b</sup>, Mi Yeon Byun <sup>a,c</sup>, Kwan-Young Lee <sup>b+</sup>, and Man Sig Lee <sup>a,d+</sup>

<sup>a</sup> Ulsan Regional Division, Korea Institute of Industrial Technology (KITECH), Ulsan 44413, South Korea

<sup>b</sup> Department of Chemical and Biological Engineering, Korea University, Seoul 02841, South Korea

<sup>c</sup> Department of Polymer Science and Chemical Engineering, Pusan National University, Busan 46241, South Korea

<sup>d</sup> Department of Green Process and System Engineering, University of Science and Technology (UST), Ulsan 44413, South Korea

<sup>+</sup>Corresponding author: Tel: +82-52-980-6630, Fax: +82-52-980-6639, E-mail: [lms5440@kitech.re.kr](mailto:lms5440@kitech.re.kr) (M.S. Lee)

Corresponding author: Tel: +82-2-3290-3299, Fax: +82-2-926-6102, E-mail: [kylee@korea.ac.kr](mailto:kylee@korea.ac.kr) (K.-Y. Lee)

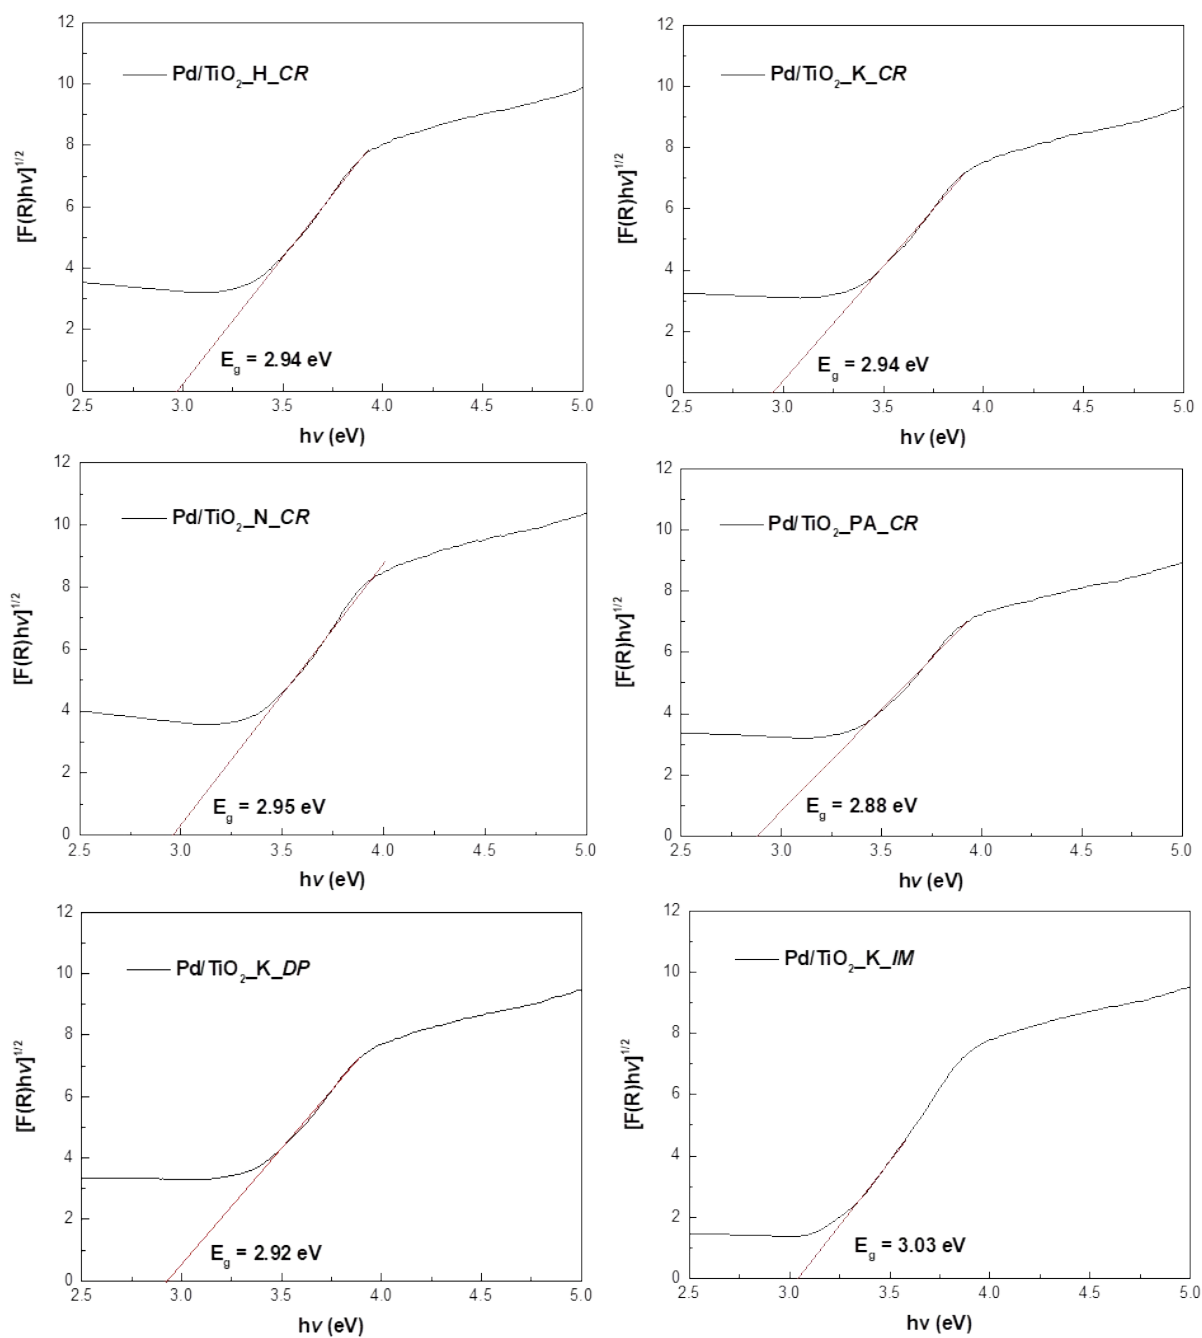

**Fig. S1** Tauc plot for band gap calculation using Kumbelka-Munk method converted from diffuse reflectance spectra of the Pd/TiO<sub>2</sub> catalysts.

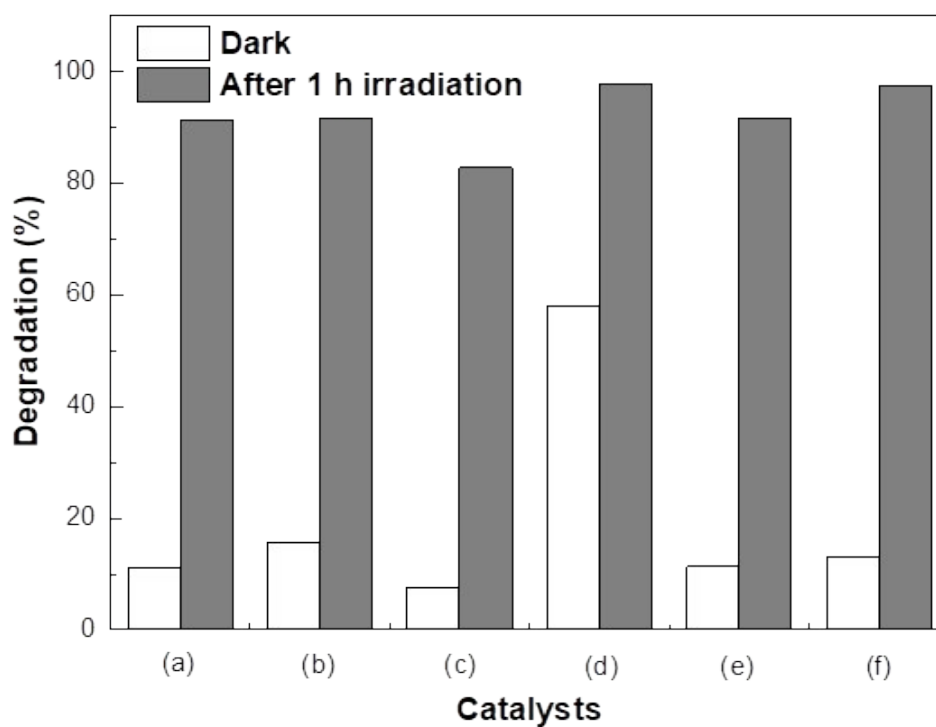

**Fig. S2** Photocatalytic activity of Pd/TiO<sub>2</sub> catalysts for photocatalytic degradation of 15 ppm MV in dark and under UV irradiation: (a) Pd/TiO<sub>2</sub>\_H\_CR, (b) Pd/TiO<sub>2</sub>\_K\_CR, (c) Pd/TiO<sub>2</sub>\_N\_CR, (d) Pd/TiO<sub>2</sub>\_PA\_CR, (e) Pd/TiO<sub>2</sub>\_K\_DP, and (f) Pd/TiO<sub>2</sub>\_K\_IM.
